# Supplementary material
Source: Springer Nature journal article supplement (https://www.springermedizin.de/resource/supplementary/12943_2010_747_MOESM5_ESM.pdf/9554728)

a

miR-23a

Human AUCACAUGCCAGGGAUUUCC 21  
 Mouse AUCACAUGCCAGGGAUUUCC 21  
 RAT AUCACAUGCCAGGGAUUUCC 21  
 Horse AUCACAUGCCAGGGAUUUCC 21  
 Dog AUCACAUGCCAGGGAUUU-- 19  
 \*\*\*\*\*

miR-27a

Human UUCACAGUGGCUAAGUUCGCG 21  
 Mouse UUCACAGUGGCUAAGUUCGCG 21  
 RAT UUCACAGUGGCUAAGUUCGCG 21  
 Horse UUCACAGUGGCUAAGUUCGCG 21  
 Dog UUCACAGUGGCUAAGUUCGG- 20  
 \*\*\*\*\*

miR-24-2

Human UGGCUCAGUUCAGCAGGAACAG- 22  
 Mouse UGGCUCAGUUCAGCAGGAACAG- 22  
 RAT UGGCUCAGUUCAGCAGGAACAG- 22  
 Horse UGGCUCAGUUCAGCAGGAACAG- 22  
 Dog UGGCUCAGUUCAGCAGGAACAGG 23  
 \*\*\*\*\*

b

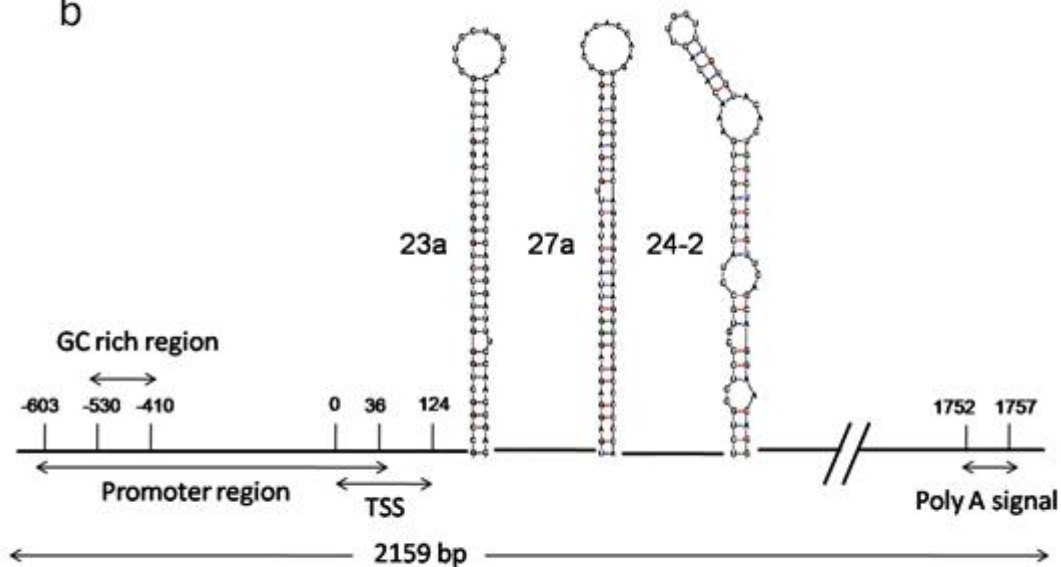

Supplement: MOESM5 [file 9554728]
